# Supplementary material
Source: Springer Nature journal article supplement (https://www.springerprofessional.de/resource/supplementary/13673_2011_13_MOESM1_ESM.pdf/11899344)

# Service Authority

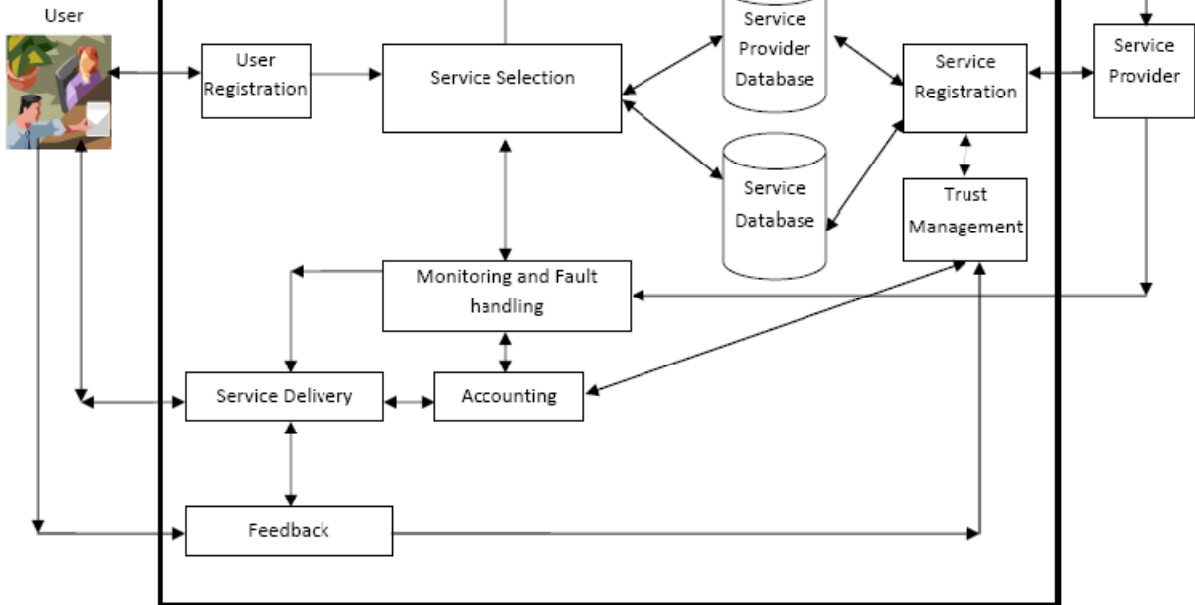

Supplement: MOESM1 [file 11899344]
